# Supplementary material for: Potential Metabolite Markers for Pancreatic Cancer Identified by Metabolomic Analysis of Induced Cancer-Associated Fibroblasts
Source: MDPI journal article supplement (doi:10.3390/cancers14061375), 2022-03-08
Supplement: s1 [file s1]

# Supplementary material: Potential Metabolite Markers for Pancreatic Cancer Identified by Metabolomic Analysis of Induced Cancer-Associated Fibroblasts

Yoshihiro Miyazaki, Nobuhito Mori, Yuka Akagi, Tatsuya Oda and Yasuyuki S. Kida\*

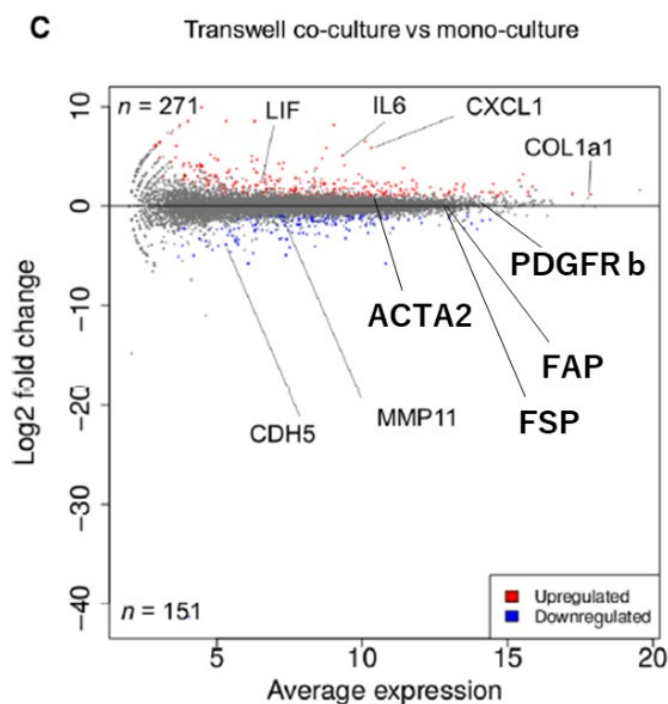

**Figure S1:** Global gene expression pattern showed that AD-MSCs were differentiated into CAF. MA plot, a scatter plot of log2 fold change versus the average expression, showing differentially expressed genes (adjusted  $p$ -value  $< 0.05$  and  $\log_2$  [fold change]  $\geq 1$ ) in transwell co-cultured AD-CAFs compared to those in monocultured AD-MSCs. Upregulated genes are shown in red, and downregulated genes are shown in blue.
